# Supplementary material
Source: Springer Nature journal article supplement (https://www.springermedizin.de/resource/supplementary/40478_2013_43_MOESM7_ESM.pdf/25658030)

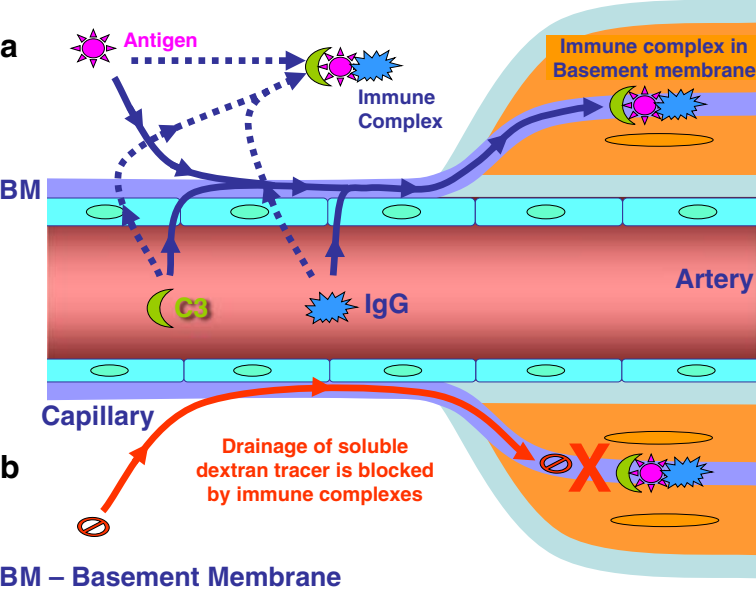

Supplement: MOESM7 [file 25658030]
